# Supplementary material for: Basic Needs in Horses?—A Literature Review
Source: MDPI journal article supplement (doi:10.3390/ani11061798), 2021-06-16
Supplement: s1 [file s1]

## Basic needs in horses? - A literature review

Konstanze Krueger<sup>1,2\*</sup>, Laureen Esch<sup>1,3</sup>, Kate Farmer<sup>4</sup>, Isabell Marr<sup>1,5</sup>

<sup>1</sup> Nuertingen-Geislingen University, Faculty Agriculture, Economics and Management, Department Equine Economics, Neckarsteige 6-10, 72622 Nürtingen, Germany

<sup>2</sup> University of Regensburg, Zoology / Evolutionary Biology, Universitätsstraße 31, 93053 Regensburg, Germany

<sup>3</sup> Ludwig Maximilian University Munich, Veterinarian Medicine, Department of animal welfare, ethology, animal hygiene and animal husbandry, Veterinaerstr. 13/R, 80539 Munich, Germany

<sup>4</sup> Centre for Social Learning & Cognitive Evolution, School of Psychology, University of St Andrews, St Andrews, Scotland KY16 9JPh, Germany

<sup>5</sup> University of Hohenheim, Behavioural Physiology of Farm Animals, Garbenstr. 17, 70599 Hohenheim, Germany

\* **Corresponding author:** Nuertingen-Geislingen University, Faculty Agriculture, Economics and Management, Department Equine Economics, Neckarsteige 6-10, 72622 Nürtingen, Germany, Tel: +497022201331, Email: Konstanze.krueger@hfwu.de

File S1: Statistical Data. Complete Generalized Linear Models (GLMs).

## Generalized Linear Model(GLM). General effects

```
Call:
glm(formula = nr. of ms. evaluating response ~ response versus no response +
     response type, family = poisson(identity), data = Dataset)
```

Deviance Residuals:

| Min     | 1Q      | Median  | 3Q     | Max    |
|---------|---------|---------|--------|--------|
| -2.3928 | -1.3176 | -0.7996 | 0.0804 | 3.6523 |

Coefficients:

|                             | Estimate | Std. Error | z value | Pr(> z )  |     |
|-----------------------------|----------|------------|---------|-----------|-----|
| (Intercept)                 | 2.1830   | 0.5269     | 4.143   | 0.0000343 | *** |
| response versus no response | 1.5171   | 0.3723     | 4.075   | 0.0000461 | *** |
| response type               | -0.4187  | 0.1630     | -2.569  | 0.0102    | *   |

---  
Signif. codes: 0 '\*\*\*' 0.001 '\*\*' 0.01 '\*' 0.05 '.' 0.1 ' ' 1

(Dispersion parameter for poisson family taken to be 1)

Null deviance: 134.16 on 50 degrees of freedom  
Residual deviance: 112.29 on 48 degrees of freedom  
(21 observations deleted due to missingness)  
AIC: 210.46

Number of Fisher Scoring iterations: 5

## General Linear Model (GLM). Response nested in response type

Call:

```
glm(formula = nr. of ms. evaluating response ~ response versus no response %in%  
     response type, family = poisson(identity), data = Dataset)
```

Deviance Residuals:

| Min     | 1Q      | Median  | 3Q     | Max    |
|---------|---------|---------|--------|--------|
| -2.3452 | -1.4936 | -0.8726 | 0.0249 | 3.7415 |

Coefficients:

|                                           | Estimate | Std. Error | z value | Pr(> z )         |
|-------------------------------------------|----------|------------|---------|------------------|
| (Intercept)                               | 1.1154   | 0.2071     | 5.385   | 0.0000000724 *** |
| response versus no response:type_abnormal | 1.2179   | 0.6571     | 1.854   | 0.06381 .        |
| response versus no response:type_active   | 1.6346   | 0.6218     | 2.629   | 0.00857 **       |
| response versus no response:type_passive  | 1.0275   | 0.5908     | 1.739   | 0.08200 .        |
| response versus no response:type_stress   | 2.3846   | 0.9581     | 2.489   | 0.01281 *        |

---

Signif. codes: 0 '\*\*\*' 0.001 '\*\*' 0.01 '\*' 0.05 '.' 0.1 ' ' 1

(Dispersion parameter for poisson family taken to be 1)

Null deviance: 134.16 on 50 degrees of freedom

Residual deviance: 116.61 on 46 degrees of freedom

(21 observations deleted due to missingness)

AIC: 218.77
